# Supplementary material
Source: PubMed Central journal article supplement (PMC10239697)
Supplement: mmc1.pdf [file mmc1.pdf]

**Supplemental information**

**Secreted ORF8 induces monocytic  
pro-inflammatory cytokines through NLRP3  
pathways in patients with severe COVID-19**

**Xiaosheng Wu, Michelle K. Manske, Gordon J. Ruan, Taylor L. Witter, Kevin E. Nowakowski, Jithma P. Abeykoon, Xinyi Tang, Yue Yu, Kimberly A. Gwin, Annie Wu, Vanessa Taupin, Vaishali Bhardwaj, Jonas Paludo, Surendra Dasari, Haidong Dong, Stephen M. Ansell, Andrew D. Badley, Matthew J. Schellenberg, and Thomas E. Witzig**

**Table S1. Top enriched genes expressed in ORF8 treated monocytes (cluster 5). Related to Figure S3**

| Top 20 genes | Function                           | ORF8 treated<br>Avg_log2FC | Induction<br>(fold) |
|--------------|------------------------------------|----------------------------|---------------------|
| CXCL8 (IL8)  | Chemokine                          | 5.14                       | 2.01                |
| CCL2         | Chemokine                          | 4.92                       | 2.61                |
| IL1 $\beta$  | Pro-inflammatory cytokine          | 3.53                       | 4.29                |
| CD14         | Monocyte marker                    | 3.66                       | 1.16                |
| CD68         | Monocyte marker                    | 3.38                       | 0.86                |
|              | Inflammasome related               |                            |                     |
| LYZ          | Lysozyme                           | 5.07                       | 0.83                |
| MMP9         | Modulator                          | 5.01                       | 1.69                |
| S100A9       | Cytokine secretion                 | 4.55                       | 1.38                |
| S100A8       | Cytokine secretion                 | 3.82                       | 2.05                |
| FTH1         | Ferritin (Acute reactant)          | 4.39                       | 1.08                |
| FTL          | Ferritin (Acute reactant)          | 3.77                       | 0.82                |
| CTSD         | Lysosomal A1 family peptidase      | 3.82                       | 0.85                |
| CTSB         | Lysosomal C1 family peptidase      | 3.69                       | 0.88                |
| CTSS         | Lysosomal C1 family peptidase      | 3.59                       | 0.80                |
| ACP5         | Acid phosphatase 5                 | 3.68                       | 0.96                |
| AIF1         | Allograft inflammatory factor 1    | 3.53                       | 0.96                |
| FUCA1        | Lysosomal $\alpha$ -L-fucosidase 1 | 3.58                       | 0.70                |
| IFI30        | Lysosomal thiol reductase          | 4.50                       | 0.90                |
| CYBB         | Microbicidal oxidase subunit       | 3.79                       | 1.14                |
| FCER1G       | Fc receptor subunit                | 3.77                       | 1.15                |

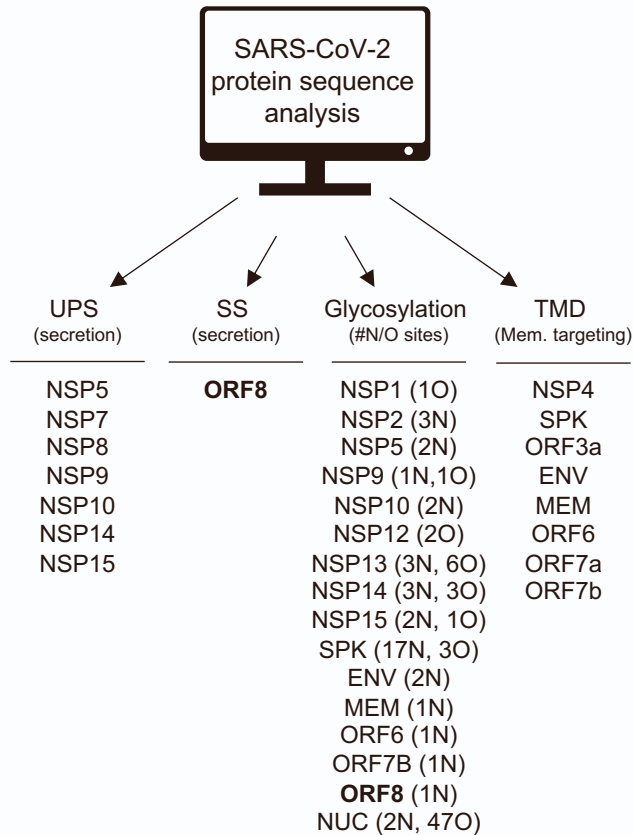

**Figure S1. *In silico* analysis of SARS-CoV-2 proteins. Related to Figure 1.** Various online tools were used for these analyses, including Outcyte 1.0 [for unconventional protein secretion (UPS) analysis], SignalP 5.0 [for signal sequence (SS) analysis], NetNGlyc 1.0 [for N-linkage glycosylation site prediction], NetOGlyc 4.0 [for O-linkage glycosylation site prediction], and TMHMM 2.0 [for transmembrane domains (TMD) analysis]. Each of their URLs can be found in the key resource table. The number of predicted N or O glycosylation sites are listed in parentheses as (3N) and (2O), respectively.

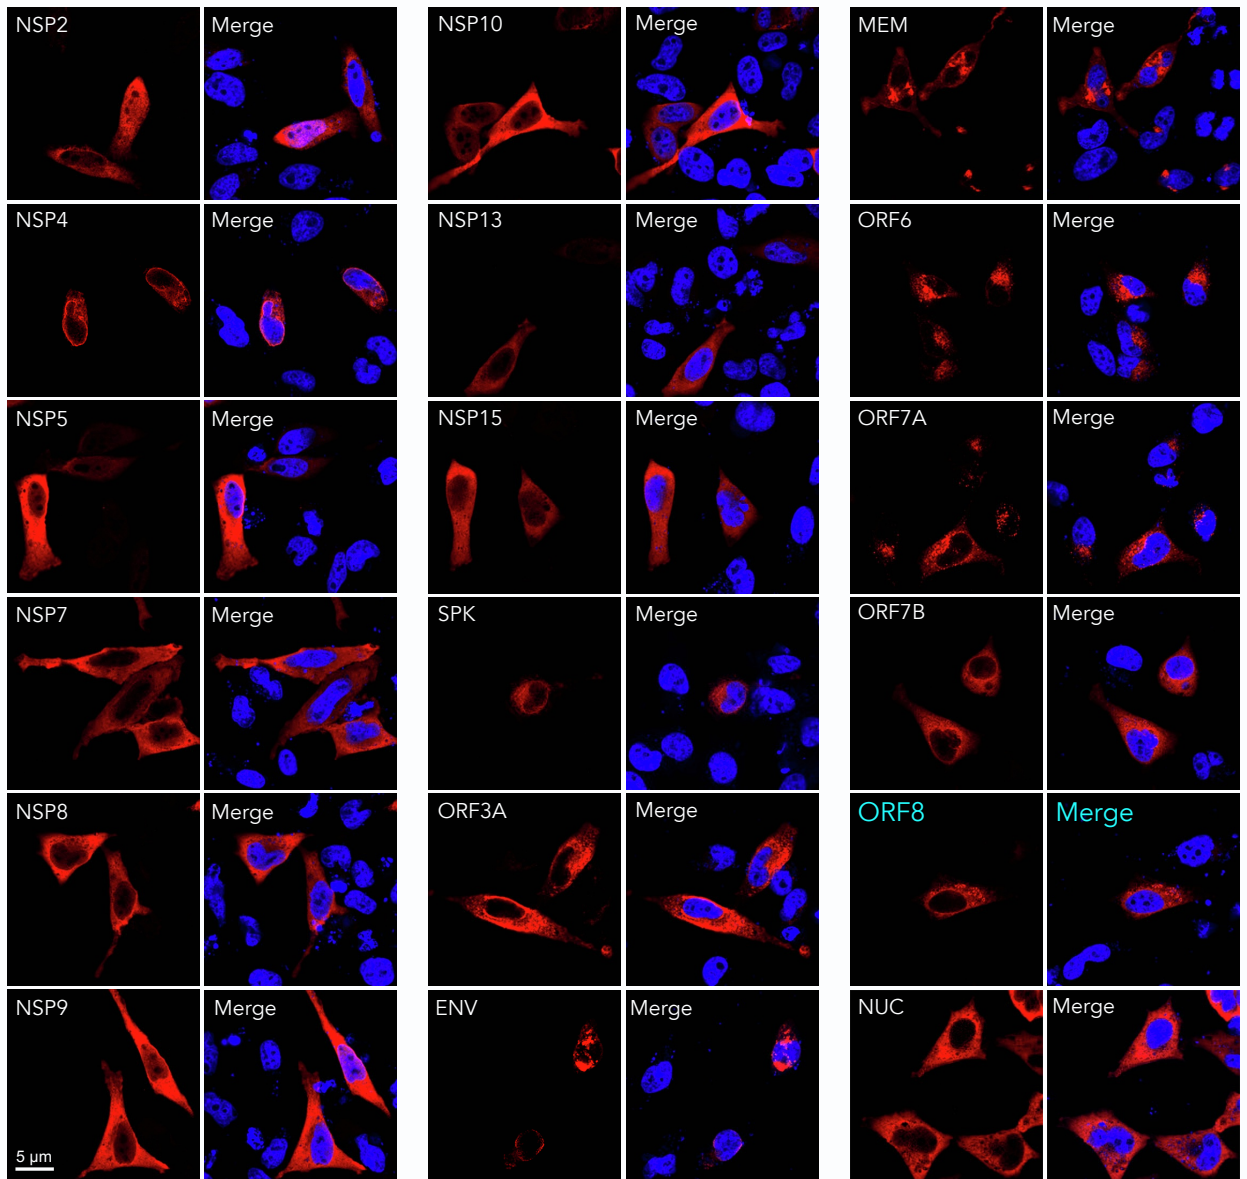

**Figure S2. Intracellular localization of major SARS-CoV-2 proteins in HeLa cells. Related to Figure 1.** Some of these proteins were not detected by Western blotting likely due to their small sizes or insolubility issues since they were readily detected by immunofluorescence here. ORF8 localized to cytoplasmic vesicular structures is consistent with its secretory nature. Scale bar: 5  $\mu$ m

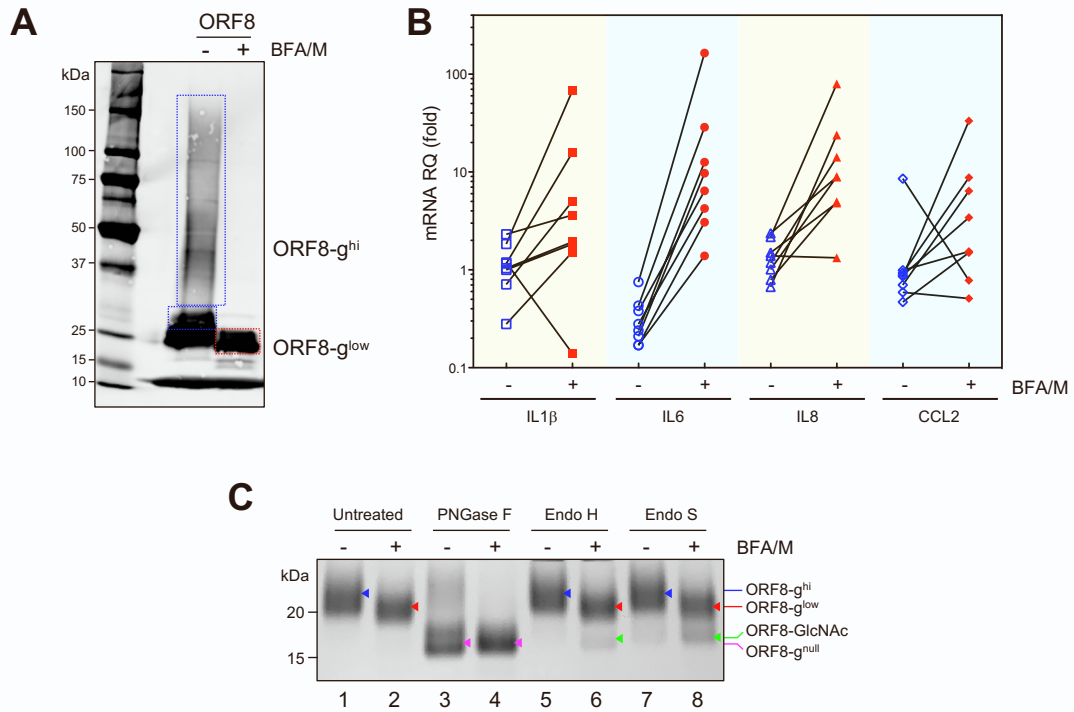

**Figure S3. Golgi inhibitors alter the glycosylation and the cytokine induction activity of ORF8. Related to Figure 2C.** **A.** ORF8 protein mobility was affected by the treatment of Golgi inhibitors BFA/M; **B.** Cytokine induction activity of ORF8 was affected by the treatment of BFA/M; **C.** ORF8 glycosylation was validated by treating the pure ORF8 protein with various glycosylases.

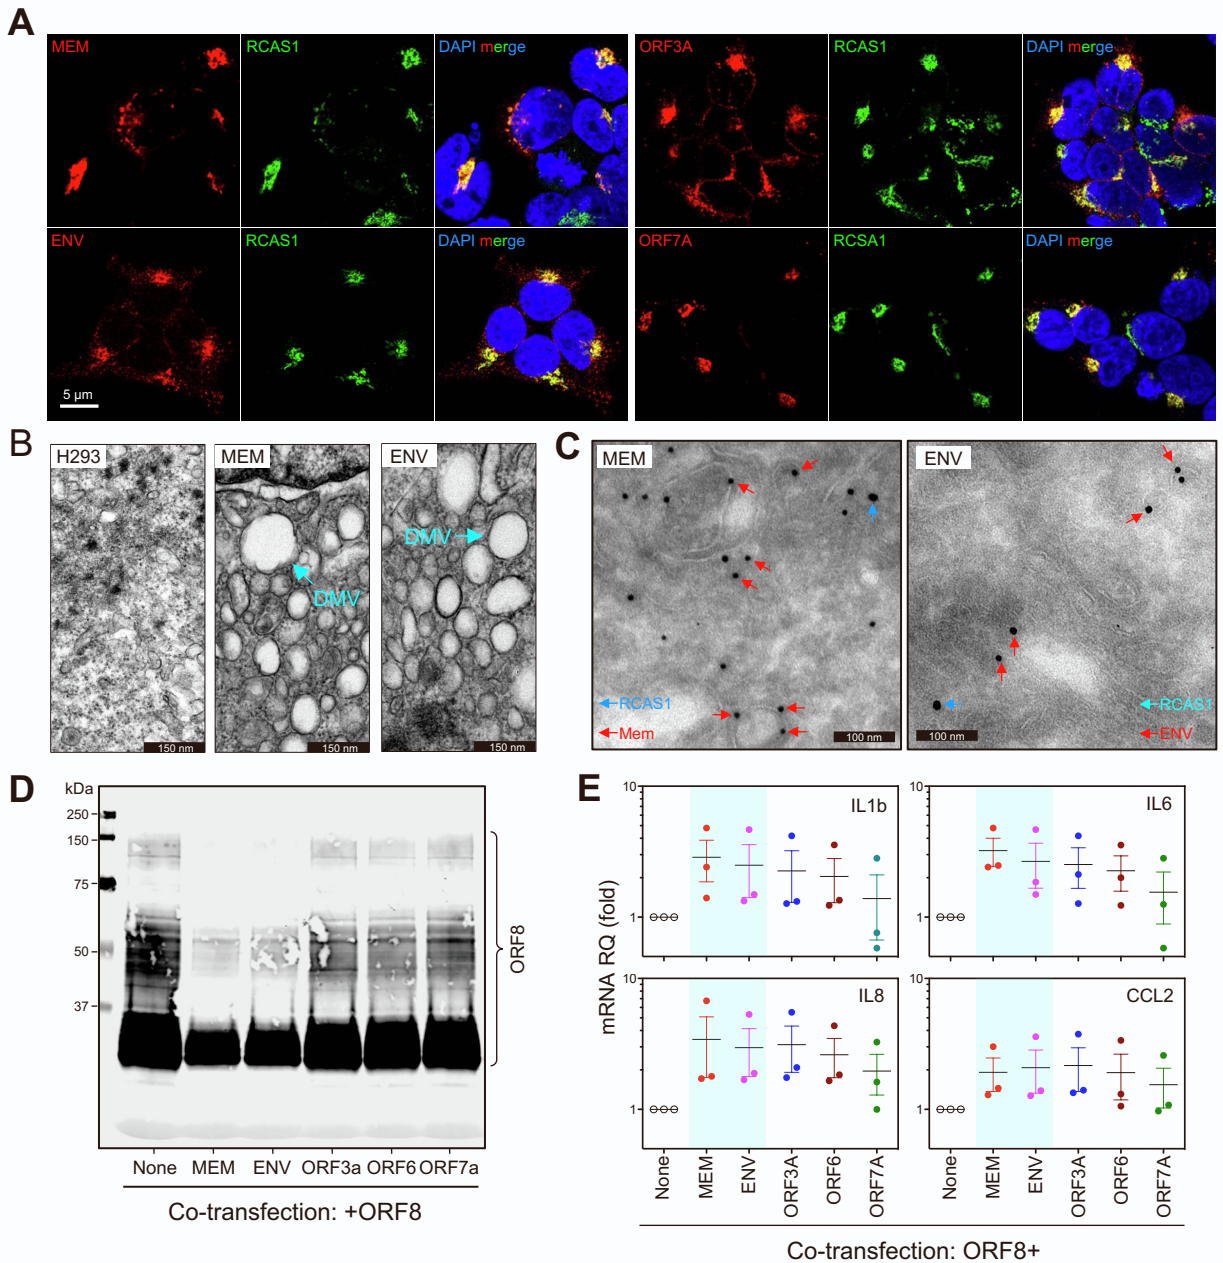

**Figure S4. Golgi-localized SARS-CoV-2 proteins affect the glycosylation and cytokine induction activity of ORF8. Related to Figure 2C. (A)** SARS-CoV-2 proteins MEM, ENV, ORF3A, and ORF7A colocalizing with Golgi protein RCAS1 by immunofluorescence; **(B)** MEM or ENV induces the formation of double-membrane vesicles (DMV) by transmission electron microscopy; **(C)** MEM, ENV co-localized with Golgi protein RCAS1 by immunogold labeling. **(D)** Co-expression of the Golgi-targeting proteins of SARS-CoV-2 affects the glycosylation of ORF8. **(E)** Co-expression of the Golgi-targeting proteins alters the cytokine induction activity of ORF8. Scale bars: 5  $\mu$ m **(A)**, 150 nm **(B)**, and 100 nm **(C)**.

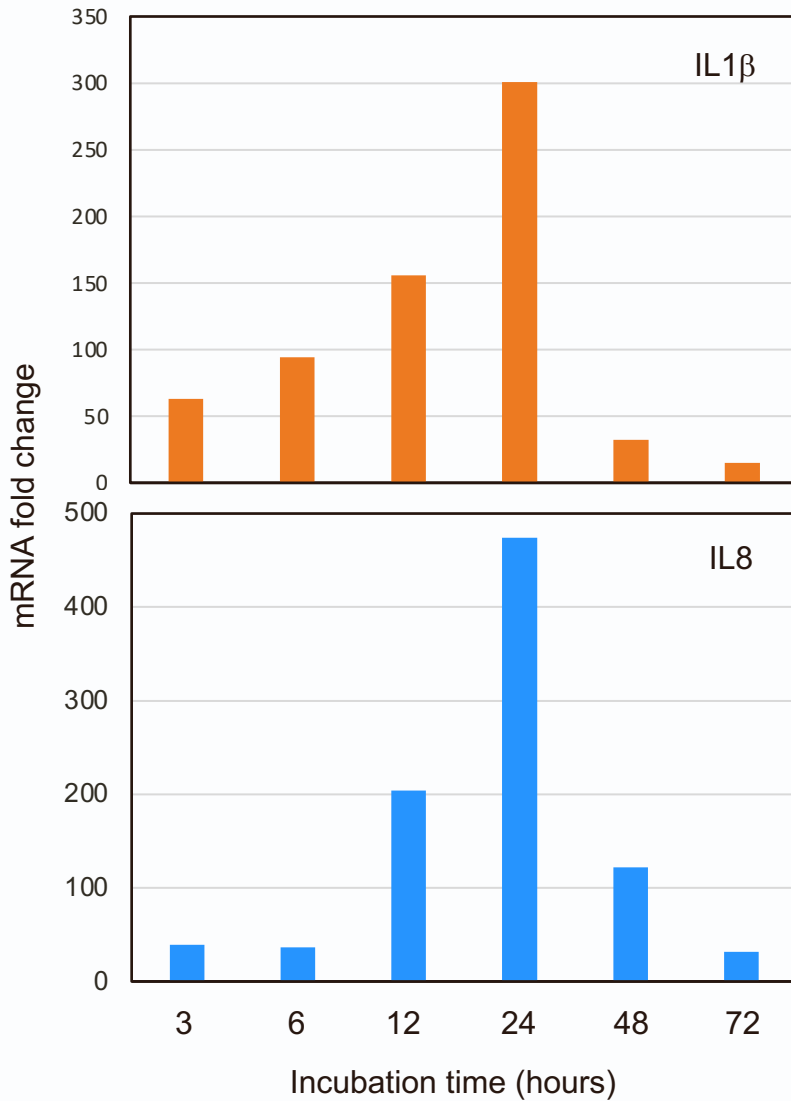

**Figure S5. IL1 $\beta$  and IL8 expression kinetics in human monocytes upon stimulation of ORF8. Related to the STAR methods section.** The mRNA levels of IL1 $\beta$  and IL6 in PBMCs treated with ORF8 (200 ng/ml) at various time points were determined by qPCRs and normalized with *HPRT1* gene expression. Data is representative of six samples.

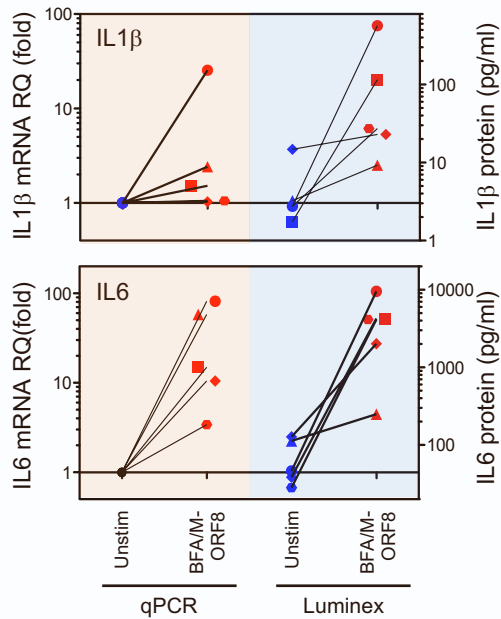

**Figure S6. Sensitivity comparison between cytokine protein and mRNA detections. Related to the STAR methods section.** Cytokine IL1 $\beta$  and IL6 proteins in the culture supernatant of PBMCs unstimulated or stimulated with ORF8 were quantitated by Luminex assay, while IL1 $\beta$  and IL6 mRNAs isolated from the cells were quantitated by qRT-PCR.
